# Supplementary material
Source: PubMed Central journal article supplement (PMC7836858)
Supplement: mmc1.pdf [file mmc1.pdf]

# THE LANCET

## Supplementary appendix

This appendix formed part of the original submission. We post it as supplied by the authors.

Supplement to: Zhu F-C, Guan X-H, Li Y-H, et al. Immunogenicity and safety of a recombinant adenovirus type-5-vectored COVID-19 vaccine in healthy adults aged 18 years or older: a randomised, double-blind, placebo-controlled, phase 2 trial. *Lancet* 2020; published online July 20. [http://dx.doi.org/10.1016/S0140-6736\(20\)31605-6](http://dx.doi.org/10.1016/S0140-6736(20)31605-6).

---

## Appendix

### Content

|                                                                                                                                                                                                                           |    |
|---------------------------------------------------------------------------------------------------------------------------------------------------------------------------------------------------------------------------|----|
| Appendix 1. Specific antibody responses to RBD, neutralizing antibodies to live SARS-CoV-2 and pseudovirus at baseline .....                                                                                              | 1  |
| Appendix 2. Specific antibody responses to RBD, neutralizing antibodies to live SARS-CoV-2 and pseudovirus post-vaccination according to pre-existing Ad5. ....                                                           | 2  |
| Appendix 3. Logistic regression analysis of seroconversion rate of S-protein by ELISA-RBD at day 28 post-vaccination with the baseline characters, vaccine dose and pre-existing Ad5 antibodies. ....                     | 4  |
| Appendix 4. Logistic regression analysis of seroconversion rate of neutralizing antibodies to live SARS-CoV-2 at day 28 post-vaccination with the baseline characters, vaccine dose and pre-existing Ad5 antibodies. .... | 5  |
| Appendix 5. Logistic regression analysis of seroconversion rate of neutralizing antibodies to pseudovirus at day 28 post-vaccination with the baseline characters, vaccine dose and pre-existing Ad5 antibodies. ....     | 6  |
| Appendix 6. Specific antibody responses to RBD, neutralizing antibodies to live SARS-CoV-2 and pseudovirus post-vaccination stratified according to age. ....                                                             | 7  |
| Appendix 7. Specific antibody responses to RBD, neutralizing antibodies to live SARS-CoV-2 and pseudovirus post-vaccination stratified according to sex. ....                                                             | 9  |
| Appendix 8. Stratified analyses of the T cell responses based on the age and sex measured by IFN $\gamma$ -ELISpot. ....                                                                                                  | 11 |
| Appendix 9. Proportion of participants with either seroconversion of neutralizing antibodies to live SARS-CoV-2 or a positive T cell response measured by INF- $\gamma$ ELISpot at day 28 post-vaccination. ....          | 12 |
| Appendix 10. Logistic regression analysis of the incidence of fever with the baseline characters, vaccine dose and pre-existing Ad5 antibodies. ....                                                                      | 13 |
| Appendix 11. List of severe (grade 3) adverse reactions reported within 28 days of follow-up. ....                                                                                                                        | 14 |
| Appendix 12. Unsolicited adverse reactions within 14 days after vaccination. ....                                                                                                                                         | 16 |
| Appendix 13. Geometric mean titres of Ad5 neutralising antibodies at days 0 and 28 post-vaccination. ....                                                                                                                 | 17 |

**Appendix 1. Specific antibody responses to RBD, neutralizing antibodies to live SARS-CoV-2 and pseudovirus at baseline**

|                                                   | <b>Vaccine at <math>1 \times 10^{11}</math> vp<br/>(n=253)</b> | <b>Vaccine at <math>5 \times 10^{10}</math> vp<br/>(n=129)</b> | <b>Placebo<br/>(n=126)</b> |
|---------------------------------------------------|----------------------------------------------------------------|----------------------------------------------------------------|----------------------------|
| <b>Baseline</b>                                   |                                                                |                                                                |                            |
| <b>ELISA antibodies to RBD</b>                    |                                                                |                                                                |                            |
| $\geq$ detection limit (1:40).                    | 11 (4%)                                                        | 6 (5%)                                                         | 2 (2%)                     |
| GMT                                               | 21.5 (20.6-22.5)                                               | 21.9 (20.4-23.6)                                               | 20.7<br>(19.7-21.8)        |
| <b>Neutralizing antibodies to live SARS-CoV-2</b> |                                                                |                                                                |                            |
| $\geq$ detection limit (1:8).                     | 0                                                              | 0                                                              | 1 (1%)                     |
| GMT                                               | 4.0 (-)                                                        | 4.0 (-)                                                        | 4.1 (3.9-4.3)              |
| <b>Neutralization antibodies to pseudovirus</b>   |                                                                |                                                                |                            |
| $\geq$ detection limit (1:10).                    | 9 (4%)                                                         | 8 (6%)                                                         | 1 (1%)                     |
| GMT                                               | 5.2 (5.1-5.3)                                                  | 5.5 (5.1-6.0)                                                  | 5.1 (4.9-5.4)              |

Data are mean (95% CI) or n (%). GMT = geometric mean antibody titre. RBD = receptor binding domain. vp=viral particles

**Appendix 2. Specific antibody responses to RBD, neutralizing antibodies to live SARS-CoV-2 and pseudovirus post-vaccination according to pre-existing Ad5.**

|                                                   | Vaccine at $1 \times 10^{11}$ vp<br>(n=253) | Vaccine at $5 \times 10^{10}$ vp<br>(n=129) | Placebo<br>(n=126)  |
|---------------------------------------------------|---------------------------------------------|---------------------------------------------|---------------------|
| <b>At day 14</b>                                  |                                             |                                             |                     |
| <b>ELISA antibodies to RBD</b>                    |                                             |                                             |                     |
| Pre-existing Ad5 $\leq$ 200                       | n=127                                       | n=54                                        | n=61                |
| GMT                                               | 194.1<br>(157.0-240.0)                      | 173.0<br>(122.5-244.2)                      | 21.0<br>(19.1-23.0) |
| Seroconversion                                    | 96, 76%                                     | 40, 76%                                     | 0                   |
| Pre-existing Ad5 $>$ 200                          | n=126                                       | n=75                                        | n=65                |
| GMT                                               | 45.7<br>(39.0-53.7)                         | 51.6<br>(37.5-70.9)                         | 20.3<br>(19.7-21.0) |
| Seroconversion                                    | 38, 30%                                     | 25, 33%                                     | 0                   |
| <b>At day 28</b>                                  |                                             |                                             |                     |
| <b>ELISA antibodies to RBD</b>                    |                                             |                                             |                     |
| Pre-existing Ad5 $\leq$ 200                       | n=127                                       | n=54                                        | n=61                |
| GMT                                               | 995.2<br>(853.8-1160.1)                     | 826.7<br>(638.3-1070.7)                     | 21.2<br>(19.4-23.2) |
| Seroconversion                                    | 125, 98%                                    | 54, 100%                                    | 0                   |
| Pre-existing Ad5 $>$ 200                          | n=126                                       | n=75                                        | n=65                |
| GMT                                               | 431.6<br>(356.5-522.5)                      | 437.5<br>(331.3-577.7)                      | 20.3<br>(19.7-21.0) |
| Seroconversion                                    | 119, 94%                                    | 71, 95%                                     | 0                   |
| <b>Neutralizing antibodies to live SARS-CoV-2</b> |                                             |                                             |                     |
| Pre-existing Ad5 $\leq$ 200                       | n=127                                       | n=54                                        | n=61                |
| GMT                                               | 31.1<br>(25.5-37.9)                         | 27.0<br>(18.9-38.5)                         | 4.1<br>(3.9-4.4)    |
| Seroconversion                                    | 94, 74%                                     | 34, 63%                                     | 0                   |
| Pre-existing Ad5 $>$ 200                          | n=126                                       | n=75                                        | n=65                |
| GMT                                               | 12.2<br>(10.1-14.8)                         | 13.8<br>(10.1-19.0)                         | 4.1<br>(3.9-4.3)    |
| Seroconversion                                    | 54, 43%                                     | 27, 36%                                     | 1, 2%               |
| <b>Neutralization antibodies to pseudovirus</b>   |                                             |                                             |                     |
| Pre-existing Ad5 $\leq$ 200                       | n=127                                       | n=54                                        | n=61                |
| GMT                                               | 85.7<br>(70.0-104.9)                        | 70.4<br>(55.2-90.0)                         | 5.9<br>(5.0-7.0)    |
| Seroconversion                                    | 117, 92%                                    | 49, 91%                                     | 1, 2%               |
| Pre-existing Ad5 $>$ 200                          | n=126                                       | n=75                                        | n=65                |
| GMT                                               | 43.8<br>(36.0-53.4)                         | 46.5<br>(34.7-62.4)                         | 5.2<br>(5.0-5.4)    |
| Seroconversion                                    | 97, 77%                                     | 58, 77%                                     | 0                   |

---

Data are mean (95% CI) or n (%). GMT = geometric mean antibody titre. RBD = receptor binding domain. Seroconversion was defined as at least a four-fold increase in post-vaccination titre from baseline. All the comparisons across the three treatment groups in terms of the above measurements show significant difference, with p values less than 0.0001, respectively. Multiple comparisons showed no significant difference between the dose group of  $1 \times 10^{11}$  vp and  $5 \times 10^{10}$  vp. vp=viral particles

**Appendix 3. Logistic regression analysis of seroconversion rate of S-protein by ELISA-RBD at day 28 post-vaccination with the baseline characters, vaccine dose and pre-existing Ad5 antibodies.**

| Model parameter                      | Estimates | P value | OR              |               |
|--------------------------------------|-----------|---------|-----------------|---------------|
|                                      |           |         | Point estimates | 95%CI by Wald |
| Intercept                            | 8.49      | <0.0001 |                 |               |
| Dose group of $1 \times 10^{11}$ vp* | -0.13     | 0.83    | 0.88            | 0.25-3.04     |
| Age                                  | -0.08     | 0.0018  | 0.92            | 0.87-0.97     |
| Sex(male)                            | -0.26     | 0.66    | 0.8             | 0.24-2.46     |
| Pre-existing Ad5 antibodies (>200)   | -1.53     | 0.052   | 0.2             | 0.05-1.02     |

\* The independent variables are the dose group (the dose group of  $5 \times 10^{10}$  vp as the reference), age (continuous variable), sex (female as reference), and the level of Ad5 antibodies pre-vaccination ( $\leq 200$  as reference) included in a multivariable analysis. vp=viral particles

**Appendix 4. Logistic regression analysis of seroconversion rate of neutralizing antibodies to live SARS-CoV-2 at day 28 post-vaccination with the baseline characters, vaccine dose and pre-existing Ad5 antibodies.**

| Model parameter                      | Estimates | P value | OR              |               |
|--------------------------------------|-----------|---------|-----------------|---------------|
|                                      |           |         | Point estimates | 95%CI by Wald |
| Intercept                            | 2.51      | <0.0001 |                 |               |
| Dose group of $1 \times 10^{11}$ vp* | 0.43      | 0.068   | 1.54            | 0.97-2.44     |
| Placebo group*                       | -5.14     | <0.0001 | 0.006           | 0.001-0.04    |
| Age                                  | -0.04     | <0.0001 | 1.0             | 0.94-0.98     |
| Sex(male)                            | -0.39     | 0.085   | 0.7             | 0.44-1.06     |
| Pre-existing Ad5 antibodies (>200)   | -1.24     | <0.0001 | 0.3             | 0.19-0.45     |

\* The independent variables are the dose group (the dose group of  $5 \times 10^{10}$  vp as the reference), age (continuous variable), sex (female as reference), and the level of Ad5 antibodies pre-vaccination ( $\leq 200$  as reference) included in a multivariable analysis. vp=viral particles

**Appendix 5. Logistic regression analysis of seroconversion rate of neutralizing antibodies to pseudovirus at day 28 post-vaccination with the baseline characters, vaccine dose and pre-existing Ad5 antibodies.**

| Model parameter                       | Estimates | P value | OR              |               |
|---------------------------------------|-----------|---------|-----------------|---------------|
|                                       |           |         | Point estimates | 95%CI by Wald |
| Intercept                             | 3.17      | <0.0001 |                 |               |
| Dose group of $1 \times 10^{11}$ vp * | 0.07      | 0.83    | 1.07            | 0.59-1.92     |
| Placebo group*                        | -6.84     | <0.0001 | 0.001           | 0.00-0.01     |
| Age                                   | -0.02     | 0.046   | 0.98            | 0.96-1.00     |
| Sex(male)                             | 0.23      | 0.43    | 1.25            | 0.71-2.20     |
| Pre-existing Ad5 antibodies (>200)    | -1.16     | 0.0003  | 0.32            | 0.17-0.59     |

\* The independent variables are the dose group (the dose group of  $5 \times 10^{10}$  vp as the reference), age (continuous variable), sex (female as reference), and the level of Ad5 antibodies pre-vaccination ( $\leq 200$  as reference) included in a multivariable analysis. vp=viral particles



**Appendix 6. Specific antibody responses to RBD, neutralizing antibodies to live SARS-CoV-2 and pseudovirus post-vaccination stratified according to age.**

|                                                   | <b>Vaccine at 1×10<sup>11</sup> vp<br/>(n=253)</b> | <b>Vaccine at 5×10<sup>10</sup> vp<br/>(n=129)</b> | <b>Placebo<br/>(n=126)</b> | <b>p value</b> |
|---------------------------------------------------|----------------------------------------------------|----------------------------------------------------|----------------------------|----------------|
| <b>At day 14</b>                                  |                                                    |                                                    |                            |                |
| <b>ELISA antibodies to RBD</b>                    |                                                    |                                                    |                            |                |
| 18-44 years old                                   | n=152                                              | n=80                                               | n=77                       |                |
| GMT                                               | 126.9<br>(102.9-156.5)                             | 106.0<br>(77.2-145.5)                              | 20.3<br>(19.7-20.8)        | <0.0001        |
| Seroconversion                                    | 97, 64%                                            | 48, 61%                                            | 0                          | <0.0001        |
| 45-54 years old                                   | n=67                                               | n=32                                               | n=35                       |                |
| GMT                                               | 67.2<br>(50.9-88.9)                                | 64.8<br>(37.5-111.9)                               | 20.0                       | <0.0001        |
| Seroconversion                                    | 27, 40%                                            | 12, 38%                                            | 0                          | <0.0001        |
| ≥55 years old                                     | n=34                                               | n=17                                               | n=14                       |                |
| GMT                                               | 49.4<br>(33.9-72.0)                                | 51.4<br>(25.5-103.6)                               | 24.5<br>(15.8-38.2)        | 0.11           |
| Seroconversion                                    | 10, 29%                                            | 5, 29%                                             | 0                          | 0.045          |
| <b>At day 28</b>                                  |                                                    |                                                    |                            |                |
| <b>ELISA antibodies to RBD</b>                    |                                                    |                                                    |                            |                |
| 18-44 years old                                   | n=152                                              | n=80                                               | n=77                       |                |
| GMT                                               | 791.8<br>(678.1-924.6)                             | 700.0<br>(553.0-886.2)                             | 20.3<br>(19.7-20.8)        | <0.0001        |
| Seroconversion                                    | 149, 98%                                           | 79, 99%                                            | 0                          | <0.0001        |
| 45-54 years old                                   | n=67                                               | n=32                                               | n=35                       |                |
| GMT                                               | 488.4<br>(365.3-652.9)                             | 424.2<br>(272.6-660.2)                             | 20.0*                      | <0.0001        |
| Seroconversion                                    | 63, 94%                                            | 31, 97%                                            | 0                          | <0.0001        |
| ≥55 years old                                     | n=34                                               | n=17                                               | n=14                       |                |
| GMT                                               | 509.0<br>(349.0-742.2)                             | 383.1<br>(203.9-719.6)                             | 25.7<br>(17.0-38.7)        | <0.0001        |
| Seroconversion                                    | 32, 94%                                            | 15, 88%                                            | 0                          | <0.0001        |
| <b>Neutralizing antibodies to live SARS-CoV-2</b> |                                                    |                                                    |                            |                |
| 18-44 years old                                   | n=152                                              | n=80                                               | n=77                       |                |
| GMT                                               | 24.6<br>(20.2-29.9)                                | 21.2<br>(15.5-29.0)                                | 4.1<br>(3.9-4.3)           | <0.0001        |
| Seroconversion                                    | 104, 68%                                           | 42, 53%                                            | 1, 1%                      | <0.0001        |
| 45-54 years old                                   | n=67                                               | n=32                                               | n=35                       |                |
| GMT                                               | 16.6<br>(12.7-21.8)                                | 17.8<br>(10.5-30.3)                                | 4.0                        | <0.0001        |
| Seroconversion                                    | 35, 52%                                            | 14, 44%                                            | 0                          | <0.0001        |
| ≥55 years old                                     | n=34                                               | n=17                                               | n=14                       |                |

|                                                 | Vaccine at $1 \times 10^{11}$ vp<br>(n=253) | Vaccine at $5 \times 10^{10}$ vp<br>(n=129) | Placebo<br>(n=126) | p value |
|-------------------------------------------------|---------------------------------------------|---------------------------------------------|--------------------|---------|
| GMT                                             | 9.6<br>(6.9-13.5)                           | 9.5<br>(6.0-15.0)                           | 4.6<br>(3.4-6.4)   | 0.028   |
| Seroconversion                                  | 9, 26%                                      | 5, 29%                                      | 0                  | 0.055   |
| <b>Neutralization antibodies to pseudovirus</b> |                                             |                                             |                    |         |
| 18-44 years old                                 | n=152                                       | n=80                                        | n=77               |         |
| GMT                                             | 72.4<br>(60.0-87.3)                         | 58.2<br>(45.8-74.0)                         | 5.5<br>(4.9-6.1)   | <0.0001 |
| Seroconversion                                  | 134, 88%                                    | 68, 85%                                     | 1, 1%              | <0.0001 |
| 45-54 years old                                 | n=67                                        | n=32                                        | n=35               |         |
| GMT                                             | 48.6<br>(36.6-64.4)                         | 56.1<br>(34.7-90.5)                         | 5.1<br>(4.9-5.4)   | <0.0001 |
| Seroconversion                                  | 52, 78%                                     | 26, 81%                                     | 0                  | <0.0001 |
| $\geq 55$ years old                             | n=34                                        | n=17                                        | n=14               |         |
| GMT                                             | 46.6<br>(30.6-71.0)                         | 42.4<br>(23.9-75.3)                         | 6.8<br>(4.0-11.7)  | <0.0001 |
| Seroconversion                                  | 28, 82%                                     | 13, 76%                                     | 0                  | <0.0001 |

Data are mean (95% CI) or n (%). GMT = geometric mean antibody titre. RBD = receptor binding domain. Seroconversion was defined as at least a four-fold increase in post-vaccination titre from baseline. P value was generated by comparisons across the three treatment groups. Pairwise comparisons showed no significant difference between the dose group of  $1 \times 10^{11}$  vp and  $5 \times 10^{10}$  vp. vp=viral particles

**Appendix 7. Specific antibody responses to RBD, neutralizing antibodies to live SARS-CoV-2 and pseudovirus post-vaccination stratified according to sex.**

|                                                   | Vaccine at $1 \times 10^{11}$ vp<br>(n=253) | Vaccine at $5 \times 10^{10}$ vp<br>(n=129) | Placebo<br>(n=126)  |
|---------------------------------------------------|---------------------------------------------|---------------------------------------------|---------------------|
| <b>At day 14</b>                                  |                                             |                                             |                     |
| <b>ELISA antibodies to RBD</b>                    |                                             |                                             |                     |
| Male                                              | n=126                                       | n=64                                        | n=64                |
| GMT*                                              | 104.2<br>(83.0-130.8)                       | 65.8<br>(48.5-89.2)                         | 20.0<br>-           |
| Seroconversion                                    | 69, 55%                                     | 31, 49%                                     | 0                   |
| Female                                            | n=127                                       | n=65                                        | n=62                |
| GMT                                               | 85.7<br>(68.3-107.4)                        | 109.3<br>(73.1-163.4)                       | 21.3<br>(19.3-23.5) |
| Seroconversion                                    | 65, 51%                                     | 34, 52%                                     | 0                   |
| <b>At day 28</b>                                  |                                             |                                             |                     |
| <b>ELISA antibodies to RBD</b>                    |                                             |                                             |                     |
| Male                                              | n=126                                       | n=64                                        | n=64                |
| GMT                                               | 676.5<br>(563.0-812.7)                      | 496.7<br>(390.1-632.4)                      | 20.0<br>-           |
| Seroconversion                                    | 120, 95%                                    | 63, 98%                                     | 0                   |
| Female                                            | n=127                                       | n=65                                        | n=62                |
| GMT                                               | 637.3<br>(525.8-772.5)                      | 655.0<br>(475.5-902.3)                      | 21.5<br>(19.6-23.6) |
| Seroconversion                                    | 124, 98%                                    | 62, 95%                                     | 0                   |
| <b>Neutralizing antibodies to live SARS-CoV-2</b> |                                             |                                             |                     |
| Male                                              | n=126                                       | n=64                                        | n=64                |
| GMT‡                                              | 20.7<br>(16.6-25.7)                         | 13.1<br>(9.8-17.5)                          | 4.0<br>-            |
| Seroconversion§                                   | 75, 60%                                     | 24, 38%                                     | 0                   |
| Female                                            | n=127                                       | n=65                                        | n=62                |
| GMT                                               | 18.5<br>(15.0-22.8)                         | 25.4<br>(17.5-36.9)                         | 4.2<br>(3.9-4.6)    |
| Seroconversion                                    | 73, 57%                                     | 37, 57%                                     | 1, 2%               |
| <b>Neutralization antibodies to pseudovirus</b>   |                                             |                                             |                     |
| Male                                              | n=126                                       | n=64                                        | n=64                |
| GMT                                               | 71.3<br>(58.0-87.7)                         | 52.5<br>(39.2-70.3)                         | 5.5<br>(4.9-6.2)    |
| Seroconversion                                    | 110, 87%                                    | 53, 83%                                     | 1, 2%               |
| Female                                            | n=127                                       | n=65                                        | n=62                |
| GMT                                               | 52.9<br>(43.0-65.1)                         | 58.2<br>(44.0-77.1)                         | 5.5<br>(4.9-6.2)    |
| Seroconversion                                    | 104, 82%                                    | 54, 83%                                     | 0                   |

---

Data are mean (95% CI) or n (%). GMT = geometric mean antibody titer. RBD = receptor binding domain. Seroconversion was defined as at least a four-fold increase in post-vaccination titre from baseline. All the comparisons across the three treatment groups in terms of the above measurements show significant difference, with p values less than 0.0001, respectively. \* dose group of  $1 \times 10^{11}$  vp vs. dose group of  $5 \times 10^{10}$  vp,  $P=0.0068$ . ‡ dose group of  $1 \times 10^{11}$  vp vs. dose group of  $5 \times 10^{10}$  vp,  $P=0.0047$ . § dose group of  $1 \times 10^{11}$  vp vs. dose group of  $5 \times 10^{10}$  vp,  $P=0.0041$ . vp=viral particles

**Appendix 8. Stratified analyses of the T cell responses based on the age and sex measured by IFN  $\gamma$ -ELISpot.**

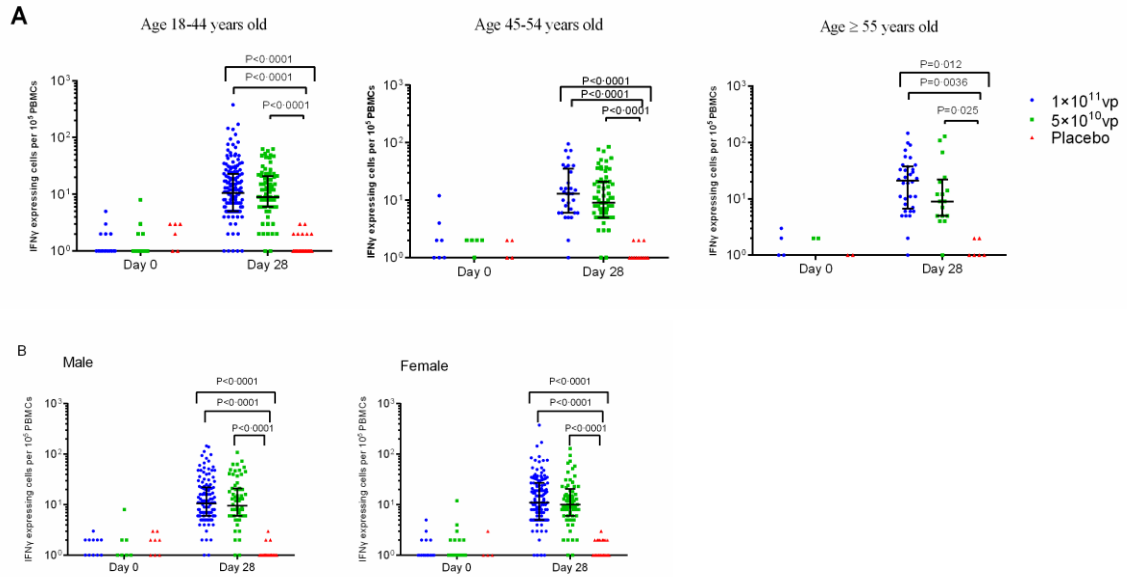

- (A) The number of specific T cells with secretion of IFN $\gamma$  at days 0, and 28 in all participants, and stratified by age. vp=viral particles
- (B) The number of specific T cells with secretion of IFN $\gamma$  at days 0, and 28 in all participants, and stratified by sex.

---

**Appendix 9. Proportion of participants with either seroconversion of neutralizing antibodies to live SARS-CoV-2 or a positive T cell response measured by INF- $\gamma$  ELISpot at day 28 post-vaccination.**

|                                |               | <b>Vaccine at <math>1 \times 10^{11}</math> vp</b> | <b>Vaccine at <math>5 \times 10^{10}</math> vp</b> | <b>Placebo</b> | <b>Total</b>   |
|--------------------------------|---------------|----------------------------------------------------|----------------------------------------------------|----------------|----------------|
|                                |               | <b>(n=253)</b>                                     | <b>(n=129)</b>                                     | <b>(n=126)</b> | <b>(n=508)</b> |
| <b>Day 28 post-vaccination</b> |               |                                                    |                                                    |                |                |
| <b>Seroconversion</b>          | <b>n (%)</b>  | 241 (95%)                                          | 118 (91%)                                          | 1 (1%)         | 360 (71%)      |
| <b>Seroconversion rate CI</b>  | <b>95% CI</b> | 92%~97%                                            | 85%~95%                                            | 0.1%~4%        | 67%~75%        |

Data are n (%) or 95% CI. A positive antibody response (seroconversion) was defined as at least a 4-fold increase in post-vaccination titer from baseline. The ELISpot T cell responses were considered positive if at least 4-fold increase in the numbers of IFN- $\gamma$ -secreting T cells was found post-vaccination compared to the baseline. vp=viral particles

**Appendix 10. Logistic regression analysis of the incidence of fever with the baseline characters, vaccine dose and pre-existing Ad5 antibodies.**

| Model parameters                                      | Estimates | P value | OR              |                |
|-------------------------------------------------------|-----------|---------|-----------------|----------------|
|                                                       |           |         | Point estimates | 95% CI by Wald |
| <b>Intercept</b>                                      | 1.47      | 0.0021  |                 |                |
| <b>Dose group of <math>1 \times 10^{11}</math> vp</b> | 0.97      | 0.0012  | 2.64            | 1.47-4.76      |
| <b>Placebo group</b>                                  | -0.80     | 0.052   | 0.45            | 0.20-1.01      |
| <b>Age</b>                                            | -0.06     | <0.0001 | 0.94            | 0.92-0.96      |
| <b>Sex</b>                                            | -0.53     | 0.030   | 0.59            | 0.36-0.95      |
| <b>Pre-existing Ad5 antibodies (&gt;1:200)</b>        | -1.55     | <0.0001 | 0.21            | 0.13-0.35      |

The occurrence of adverse reactions (fever) is the dependent variable. The independent variables are the dose group (the dose group of  $5 \times 10^{10}$  vp as the reference), age (continuous variable), sex (female as reference), and the level of Ad5 antibodies pre-vaccination ( $\leq 200$  as reference) included in a multivariable analysis. vp=viral particles

**Appendix 11. List of severe (grade 3) adverse reactions reported within 28 days of follow-up.**

| <b>ID of participants</b> | <b>Dose group</b>     | <b>Symptom</b>     | <b>Grade</b> | <b>Start time</b>        | <b>Resolve time</b> | <b>Treatment</b>        |
|---------------------------|-----------------------|--------------------|--------------|--------------------------|---------------------|-------------------------|
| <b>007*</b>               | Placebo               | Muscle strain      | 3            | Day 16 after vaccination | 72h                 | Outpatient treatment    |
| <b>009</b>                | 1×10 <sup>11</sup> vp | Fever              | 3            | Day 0 after vaccination  | 24h                 | No treatment            |
| <b>013</b>                | 1×10 <sup>11</sup> vp | Fever              | 3            | Day 0 after vaccination  | 24h                 | Self-purchased medicine |
| <b>019</b>                | 1×10 <sup>11</sup> vp | Swelling           | 3            | Day 0 after vaccination  | 48h                 | No treatment            |
| <b>051</b>                | 1×10 <sup>11</sup> vp | Fever              | 3            | Day 1 after vaccination  | 24h                 | No treatment            |
| <b>054</b>                | 1×10 <sup>11</sup> vp | Fever              | 3            | Day 1 after vaccination  | 48h                 | Self-purchased medicine |
| <b>059</b>                | 1×10 <sup>11</sup> vp | Fatigue            | 3            | Day 1 after vaccination  | <24h                | No treatment            |
| <b>062</b>                | 1×10 <sup>11</sup> vp | Fever              | 3            | Day 1 after vaccination  | 24h                 | No treatment            |
| <b>067</b>                | 1×10 <sup>11</sup> vp | Fever              | 3            | Day 1 after vaccination  | 24h                 | No treatment            |
| <b>075</b>                | 1×10 <sup>11</sup> vp | Fever              | 3            | Day 1 after vaccination  | <24h                | Self-purchased medicine |
| <b>104</b>                | 5×10 <sup>10</sup> vp | Fever              | 3            | Day 1 after vaccination  | <24h                | No treatment            |
| <b>126</b>                | 1×10 <sup>11</sup> vp | Fever              | 3            | Day 1 after vaccination  | <24h                | No treatment            |
| <b>143</b>                | 1×10 <sup>11</sup> vp | Fever              | 3            | Day 1 after vaccination  | <24h                | Self-purchased medicine |
| <b>162</b>                | 1×10 <sup>11</sup> vp | Fever              | 3            | Day 0 after vaccination  | 48h                 | Self-purchased medicine |
| <b>164</b>                | 1×10 <sup>11</sup> vp | Fever              | 3            | Day 1 after vaccination  | 24h                 | No treatment            |
| <b>183*</b>               | Placebo               | Buccal ulceration  | 3            | Day 21 after vaccination | 144h                | Outpatient treatment    |
|                           |                       | Oropharyngeal pain | 3            | Day 17 after vaccination | 168h                | Self-purchased medicine |
| <b>186</b>                | 1×10 <sup>11</sup> vp | Induration         | 3            | Day 1 after vaccination  | 96h                 | No treatment            |
| <b>197</b>                | 1×10 <sup>11</sup> vp | Fever              | 3            | Day 1 after vaccination  | 96h                 | Self-purchased medicine |
| <b>202</b>                | 1×10 <sup>11</sup> vp | Fever              | 3            | Day 0 after vaccination  | 48h                 | Self-purchased medicine |
| <b>211</b>                | 1×10 <sup>11</sup> vp | Fever              | 3            | Day 0 after vaccination  | 24h                 | Self-purchased medicine |
| <b>216</b>                | 1×10 <sup>11</sup> vp | Induration         | 3            | Day 1 after vaccination  | 72h                 | No treatment            |



---

|            |                       |             |   |                         |     |                         |
|------------|-----------------------|-------------|---|-------------------------|-----|-------------------------|
| <b>217</b> | 1×10 <sup>11</sup> vp | Fever       | 3 | Day 1 after vaccination | 48h | Self-purchased medicine |
|            |                       | Headache    | 3 | Day 1 after vaccination | 96h | No treatment            |
| <b>234</b> | 1×10 <sup>11</sup> vp | Fever       | 3 | Day 0 after vaccination | 72h | No treatment            |
| <b>240</b> | 1×10 <sup>11</sup> vp | Fever       | 3 | Day 0 after vaccination | 48h | No treatment            |
| <b>272</b> | 1×10 <sup>11</sup> vp | Fever       | 3 | Day 1 after vaccination | 48h | Self-purchased medicine |
|            |                       | Muscle pain | 3 | Day 1 after vaccination | 24h | No treatment            |
|            |                       | Joint pain  | 3 | Day 1 after vaccination | 48h | No treatment            |
|            |                       | Dyspnea     | 3 | Day 1 after vaccination | 24h | No treatment            |
|            |                       | Insomnia    | 3 | Day 1 after vaccination | 24h | No treatment            |
|            |                       | Headache    | 3 | Day 1 after vaccination | 24h | No treatment            |
| <b>436</b> | 1×10 <sup>11</sup> vp | Fever       | 3 | Day 0 after vaccination | 48h | Self-purchased medicine |
| <b>473</b> | 1×10 <sup>11</sup> vp | Fever       | 3 | Day 0 after vaccination | 48h | No treatment            |

---

\*The adverse reactions of these participants were not considered to be related to the vaccine. vp=viral particles

**Appendix 12. Unsolicited adverse reactions within 14 days after vaccination.**

|                                                                    | Vaccine at 1×10 <sup>11</sup> vp<br>(n=253) | Vaccine at 5×10 <sup>10</sup> vp<br>(n=129) | Placebo<br>(n=126) | P value* |
|--------------------------------------------------------------------|---------------------------------------------|---------------------------------------------|--------------------|----------|
| <b>Unsolicited injection-site adverse reactions within 14 days</b> |                                             |                                             |                    |          |
| Hemorrhage                                                         | 1 (<1%)                                     | 1 (1%)                                      | 0                  | 1·0      |
| Muscle swelling                                                    | 3 (1%)                                      | 2 (2%)                                      | 1 (1%)             | 1·0      |
| <b>Unsolicited systemic adverse reactions within 14 days</b>       |                                             |                                             |                    |          |
| Backache                                                           | 1 (<1%)                                     | 0                                           | 1 (1%)             | 0·75     |
| Coryza                                                             | 0                                           | 0                                           | 1 (1%)             | 0·25     |
| Earache                                                            | 1 (<1%)                                     | 0                                           | 0                  | 1·0      |
| Noninfective gingivitis                                            | 1 (<1%)                                     | 0                                           | 0                  | 1·0      |
| Abdominal distress                                                 | 1 (<1%)                                     | 0                                           | 0                  | 1·0      |
| Abdominal distension                                               | 1 (<1%)                                     | 0                                           | 0                  | 1·0      |
| Hypoaesthesia                                                      | 0                                           | 1 (1%)                                      | 0                  | 0·50     |
| Joint swelling                                                     | 0                                           | 1 (1%)                                      | 0                  | 0·50     |
| Muscular weakness                                                  | 1 (<1%)                                     | 0                                           | 1 (1%)             | 0·75     |
| Expectoration                                                      | 1 (<1%)                                     | 0                                           | 0                  | 1·0      |
| Thirst                                                             | 0                                           | 0                                           | 1 (1%)             | 0·25     |
| Hypoesthesia oral                                                  | 2 (1%)                                      | 0                                           | 0                  | 0·75     |
| Buccal ulceration                                                  | 1 (<1%)                                     | 0                                           | 0                  | 1·0      |
| Oral herpes                                                        | 1 (<1%)                                     | 0                                           | 0                  | 1·0      |
| Lymph node pain                                                    | 1 (<1%)                                     | 0                                           | 0                  | 1·0      |
| Sniffles                                                           | 1 (<1%)                                     | 0                                           | 0                  | 1·0      |
| Insomnia                                                           | 1 (<1%)                                     | 0                                           | 0                  | 1·0      |
| Grade 3 insomnia                                                   | 1 (<1%)                                     | 0                                           | 0                  | 1·0      |
| Somnolence                                                         | 1 (<1%)                                     | 1 (1%)                                      | 1 (1%)             | 1·0      |
| Dizziness                                                          | 3 (1%)                                      | 2 (2%)                                      | 1 (1%)             | 1·0      |
| Palpitation                                                        | 1 (<1%)                                     | 0                                           | 0                  | 1·0      |
| Musculoskeletal chest pain                                         | 1 (<1%)                                     | 0                                           | 0                  | 1·0      |
| Chest pain                                                         | 0                                           | 0                                           | 1 (1%)             | 0·25     |
| Axillary pain                                                      | 1 (<1%)                                     | 0                                           | 0                  | 1·0      |
| Faeces hard                                                        | 0                                           | 0                                           | 1 (1%)             | 0·25     |
| Aching in limb                                                     | 1 (<1%)                                     | 0                                           | 0                  | 1·0      |

Data are n (%). Any refers to all the participants with any grade adverse reactions or events. Adverse reactions and events were graded according to the scale issued by the China State Food and Drug Administration. Grade 3=severe (ie, prevented activity). \*Calculated with  $\chi^2$  test or Fisher's exact test. vp=viral particles

**Appendix 13. Geometric mean titres of Ad5 neutralising antibodies at days 0 and 28 post-vaccination.**

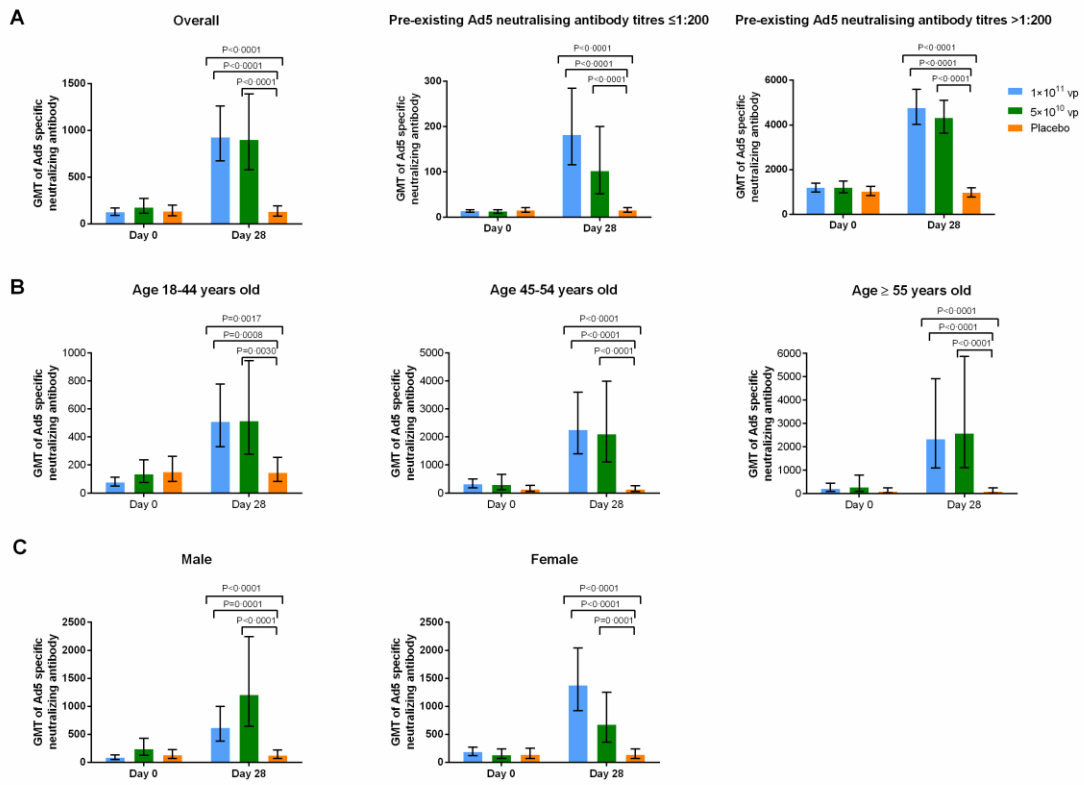

- (A) GMT of Ad5 neutralising antibodies at days 0 and 28 post-vaccination in all participants, and stratified by pre-existing Ad5 neutralising antibody titres. vp=viral particles
- (B) GMT of Ad5 neutralising antibodies at days 0 and 28 post-vaccination stratified by age.
- (C) GMT of Ad5 neutralising antibodies at days 0 and 28 post-vaccination stratified by sex. GMT=geometric mean titre. Ad5=adenovirus type-5.
